# Supplementary material for: Investigation of the Optimal Prime Boost Spacing Regimen for a Cancer Therapeutic Vaccine Targeting Human Papillomavirus
Source: MDPI journal article supplement (doi:10.3390/cancers14174339), 2022-09-05
Supplement: s1 [file s1]

Supplemental Figure S2

**A**

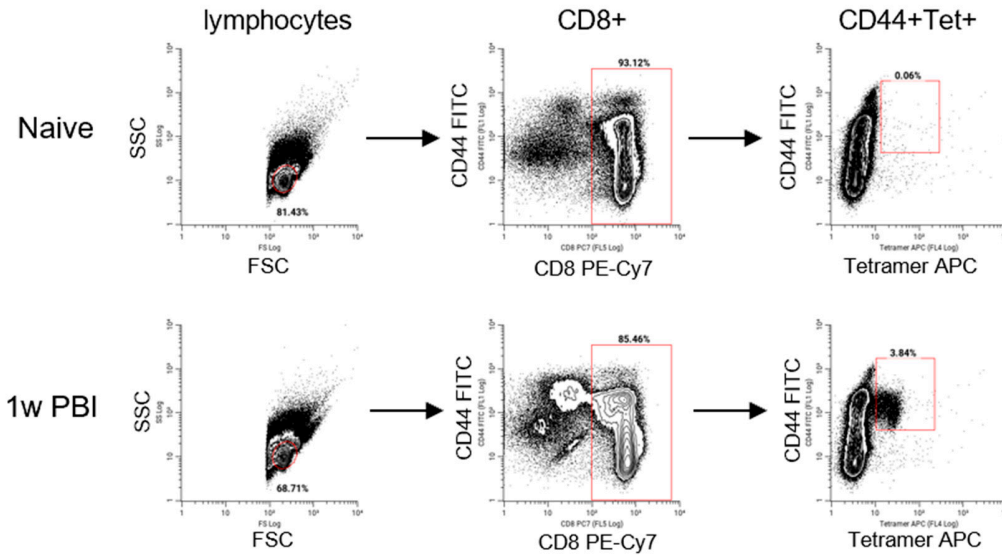

**B**

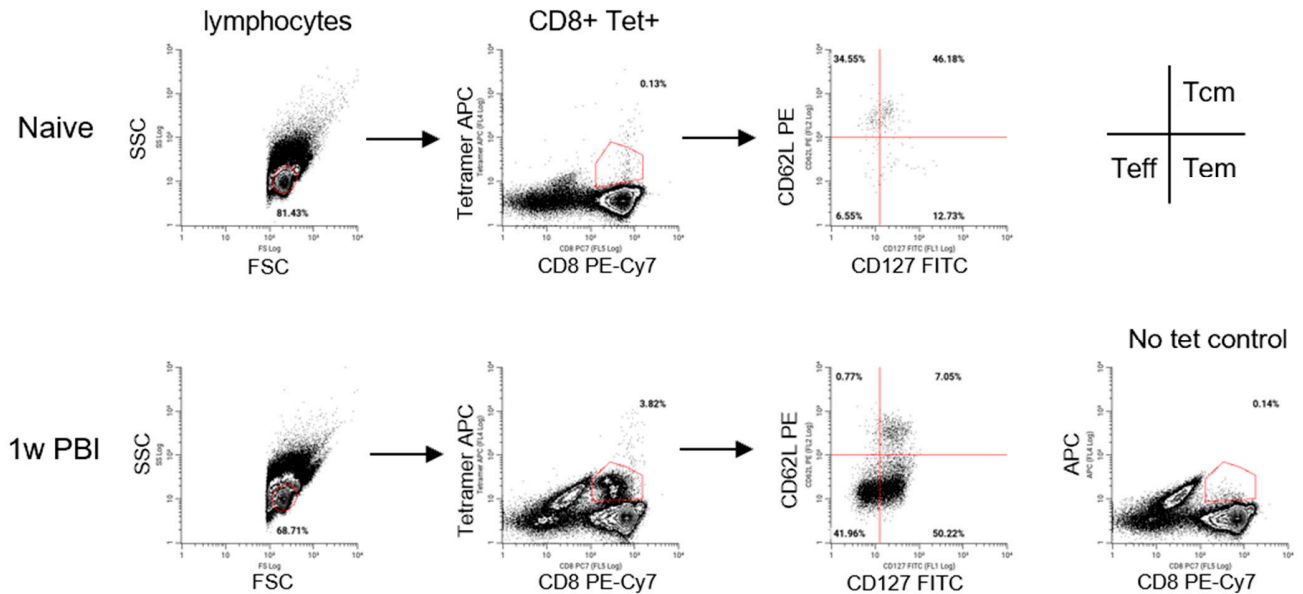

**Supplemental Figure S2.** Flow cytometry gating schema for CD8+Tetramer+ memory T cell phenotypic markers. Splenocytes from experimental mice were isolated and stained with antibodies to CD8, CD62L, CD127, CD44 and HPV16 E7(49-57) MHC tetramer reagent. For each sample, a no-tetramer negative control was stained. Lymphocytes were gated on FSC/SSC. Shown are representative examples of tetramer positive events in the 1 week PBI group and the naïve group. (A) Tetramer-positive cells show a phenotype of CD44+, indicating antigen-experienced T cells. (B) HPV16 E7 specific T cells identified by tetramer staining show phenotypic markers of central memory (Tcm; CD62L+CD127+) and effector memory (Tem; CD62L-CD127+) T cells, in addition to differentiated effector T cells (Teff; CD62L-CD127-). Samples stained without tetramer were used to define positive tetramer gate position.
