# Supplementary material for: Investigation of the Optimal Prime Boost Spacing Regimen for a Cancer Therapeutic Vaccine Targeting Human Papillomavirus
Source: Cancers (Basel). 2022 Sep 5;14(17):4339. doi: 10.3390/cancers14174339 (PMC9454731; doi:10.3390/cancers14174339)
Supplement: Supplementary file 1 [file cancers-14-04339-s001.zip › Supplemental File S1.xlsx]

## Sheet: Figure 2
IFNg spot forming cells per million splenocytes
		Naive	1 vax	3 days	1 week	2 weeks	3 weeks	4 weeks
Experiment 1	mouse 1	2.67		154.67	450.67	448	631.33	270.67
	mouse 2	5.33		199.33	1040	451.33	402.67	338
	mouse 3	2.67		174.67	628	387.33	186	172
	mouse 4	0		234	756	390.67	592	601.33
	mouse 5	0		243.33	486.67	266	779.33	201.33
Experiment 2	mouse 1	6.67	588	906.67	350.67	921.33	474.67	258.67
	mouse 2	0	948	634.67	613.33	392	296	652
	mouse 3	190.67	410.67	397.33	1010.67	954.67	1089.33	557.33
	mouse 4	0	181.33	253.33	1096	774.67	633.33	364
	mouse 5	0	729.33	346.67	924	321.33		593.33
Experiment 3	mouse 1	6.7	193.3	300	933.3	1100	466.7	1306.7
	mouse 2	0	73.3	0	200	253.3	1060	120
	mouse 3	0	300	133.3	860	213.3	480	493.3
	mouse 4	6.7	86.7	453.3	713.3	280	333.3	420
	mouse 5	0	193.3	146.7	526.7	546.7	313.3	486.7
Percent CD8+ tetramer+ cells
		Naive	1 vax	3 days	1 week	2 weeks	3 weeks	4 weeks
Experiment 1	mouse 1	0.07		0.27	1.27	0.74	0.71	0.65
	mouse 2	0.06		0.36	1.95	0.67	0.51	0.84
	mouse 3	0.04		0.36	1.46	0.38	0.69	0.6
	mouse 4	0.05		0.45	3.24	1.09	0.54	1.33
	mouse 5	0.08		0.68	1.55	1.28	2.43	0.41
Experiment 2	mouse 1	0.05	0.36	0.32	0.63	0.53	0.67	0.9
	mouse 2	0.09	0.27	0.29	0.36	0.43	0.55	1.2
	mouse 3	0.08	0.52	0.4	0.69	0.35	0.43	0.8
	mouse 4	0.08	0.31	0.36	0.47	0.4	0.41	0.81
	mouse 5	0.06	0.4	0.51	0.93	0.48		0.76
Experiment 3	mouse 1	0.18	0.6	0.58	1.36	1.66	0.27	1.66
	mouse 2	0.15	1.61	0.71	2.53	0.86	1.63	2.7
	mouse 3	0.19	1.1	0.4	3.38	1.32	1.1	1.86
	mouse 4	0.13	0.69	0.4	4.16	2.67	2.22	1.54
	mouse 5	0.08	0.97	0.62	1.39	2.81	2.22	1.24
In vivo cytotoxicity assay (% lysis)
		Naive	1 vax	3 days	1 week	2 weeks	3 weeks	4 weeks
Experiment 1	mouse 1	28.61	92.24	70.46	83.28	94.02		73.7
	mouse 2	29.23	91.59	86.93	92.83	94.08	90.6	90.76
	mouse 3	21.68	86.62	79.73	87.84	91.54	89.91	87.98
	mouse 4	30.54	92.06	68.02	90.76	93.41	91.48	90.45
	mouse 5	35.03	86.81	74.18	83.77	93.77	84.91	86.18

## Sheet: Figure 3
Survival (1=censored; 0= alive)
Days post tumor challenge	4 weeks	3 weeks	2 weeks	1 week	3 days	1 vax	Naive
0
22							1
26							1
29					1	1	1
29						1	1
29						1	1
29							1
29							1
29							1
33	1	1	1	1	1	1	1
33		1	1	1	1	1
33		1		1
33				1
37	1			1	1
37					1
41		1	1	1	1	1
41		1	1	1	1	1
41				1
44	1	1	1		1	1
48	1	1		1
48	1
51	1
55		1		1	1
65			1
70	0	0	0		0	0
70	0	0	0			0
70	0		0
70	0		0

## Sheet: Figure 4
Phenotype of tetramer-positive memory and effector populations
group	mouse	CD8+	Mean	SD		CD8+	Mean	SD		CD8+	Mean	SD		CD8+	Mean	SD
		E7tetr+				E7tetr+				E7tetr+				E7tetr+
		CD127+				CD127+				CD127-				CD127-
		CD62L-				CD62L+				CD62L-				CD62L+
		Tem				Tcm				Teff				other
4w	1	48.28	51.488	4.44411		14.19	10.926	2.72773		36.5	36.436	5.26371		1.38	1.488	0.615443
	2	46.78				7.28				45.31				1.01
	3	55.62				11.17				31.95				1.5
	4	56.72				9.3				33.2				1.03
	5	50.04				12.69				35.22				2.52
3w	6	58.82	56.095	4.3297		9.68	8.335	2.98244		30.89	34.745	2.66899		0.82	1.2625	0.677071
	7	49.85				11.88				36.76				2.22
	8	56.51				6.31				36.28				1.26
	9	59.2				5.47				35.05				0.75
2w	11	45.96	52.924	8.26868		7.25	8.546	3.9295		46.09	37.44	8.52494		1.08	1.53	0.891964
	12	44.36				13.96				39.31				3.07
	13	64.48				11.16				23.28				1.54
	14	52.65				5.98				40.88				1.02
	15	57.17				4.38				37.64				0.94
1w	16	69.17	62.59	4.12848		10.83	6.606	3.2386		20	30.338	7.13229		0.68	0.982	0.625356
	17	58.88				5.18				35.47				0.89
	18	61.39				4.33				34.38				0.29
	19	59.72				3.45				36.08				1.08
	20	63.79				9.24				25.76				1.97
3d	21	54.87	45.13	9.26963		21.2	25.184	5.61369		20.17	24.168	6.08417		4.27	6.086	1.90969
	22	54.55				18.01				23.63				4.21
	23	43.61				31.96				16.7				8.04
	24	35.26				28.64				28.76				8.06
	25	37.36				26.11				31.58				5.85
1 vax	26	35.8	49.668	9.19211		28.17	20.664	7.49312		30.21	26.978	5.22298		6.19	3.012	2.0267
	27	61.33				13.01				23.15				2.75
	28	51.36				16.86				30.54				1.61
	29	48.1				29.25				19.71				3.51
	30	51.75				16.03				31.28				1
naive	31	9.01	8.176	2.09497		57.21	53.82	4.21823		5.41	5.874	1.02856		29.28	33.116	4.09165
	32	6.89				47.87				6.23				40
	33	11.03				51.03				7.24				31.72
	34	8.42				55.45				4.46				33.17
	35	5.53				57.54				6.03				31.41

## Sheet: Figure 5
Figure 5 tumor measurement (mm3)
Day post challenge	0	10	13	16	20	23	26	30	33	37	41	44	48	51	56	62	68
mouse
1	0	0	0	0	0	0	0	0	0	0	0	0	0	0	0	0	0
2	0	0	0	0	0	0	0	0	0	0	0	0	0	0	0	0	0
3	0	0	0	0	0	0	0	0	0	0	0	0	0	0	0	0	0
4	0	1	0	0	0	0	0	0	0	0	0	0	0	0	0	0	0
5	0	1	1	0	0	0	0	0	0	0	0	0	0	0	0	0	0
6	0	1	0	0	0	0	0	0	0	0	0	0	0	0	0	0	0
7	0	0	0	0	0	0	0	0	0	0	0	0	0	0	0	0	0
8	0	1	0	0	0	0	0	0	0	0	0	0	0	0	0	0	0
9	0	0.125	1	0	0	0	0	0	0	0	0	0	0	0	0	0	0
10	0	1	0	0	0	0	0	0	0	0	0	0	0	0	0	0	0
11	0	0	0	0	0	0	0	0	0	0	0	0	0	0	0	0	0
12	0	0	0	0	0	0	0	0	0	0	0	0	0	0	0	0	0
13	0	0	0	0	0	0	0	0	0	0	0	0	0	0	0	0	0
14	0	0	0	0	0	0	0	0	0	0	0	0	0	0	0	0	0
15	0	1	1	0	0	0	0	0	0	0	0	0	0	0	0	0	0
16	0	0.125	0	0	0	0	0	0	0	0	0	0	0	0	0	0	0
17	0	1	1	0	0	0	0	0	0	0	0	0	0	0	0	0	0
18	0	0.125	1	1	0.125	0.125	0.125	1	27	112	112	350	432	768	1680
19	0	0	0	0	0	0	0	0	0	0	0	0	0	0	0	0	0
20	0	1	0	0	0	0	0	0	0	0	0	0	0	0	0	0	0
21	0	1	0	0	0	0	0	0	0	0	0	0	0	0	0	0	0
22	0	0	1	1	0	0	0	0	0	0	0	0	0	0	0	0	0
23	0	0	1	1	8	48	1	1	378	720	1320	1980
24	0	0	0	0	0	0	0	0	0	0	0	0	0	0	0	0	0
25	0	1	1	0	0	0	0	0	0	0	0	0	0	0	0	0	0
26	0	1	1	1	0	0	0	0	0	0	0	0	0	0	0	0	0
27	0	0	0	0	0	0	0	0	0	0	0	0	0	0	0	0	0
28	0	1	0	0	0	0	0	0	0	0	0	0	0	0	0	0	0
29	0	0.125	0	0	0	0	0	0	0	0	0	0	0	0	0	0	0
30	0	0.125	0	0	0	0	0	0	0	0	0	0	0	0	0	0	0
31	0	0	0	0	0	0	0	0	0	0	0	0	0	0	0	0	0
32	0	0	0	0	0	0	0	0	0	0	0	0	0	0	0	0	0
33	0	1	0	0	0	0	0	0	0	0	0	0	0	0	0	0	0
34	0	1	1	0	0	0	0	0	0	0	0	0	0	0	0	0	0
35	0	0	0	0	0	0	0	0	0	0	0	0	0	0	0	0	0
36	0	1	0	0	0	0	0	0	0	0	0	0	0	0	0	0	0
37	0	0	1	0	0	0	0	0	0	0	0	0	0	0	0	0	0
38	0	0.125	1	1	0	0	0	0	0	0	0	0	0	0	0	0	0
39	0	0	0.125	1	0	0	0	0	0	0	0	0	0	0	0	0	0
40	0	0	1	0	0	0	0	0	0	0	0	0	0	0	0	0	0
41	0	1	1	0	0	0	0	0	0	0	0	0	0	0	0	0	0
42	0	1	1	0	0	0	0	0	0	0	0	0	0	0	0	0	0
43	0	0	0	0	0	0	0	0	0	0	0	0	0	0	0	0	0
44	0	1	1	0	0	0	0	0	0	0	0	0	0	0	0	0	0
45	0	1	0.125	0	0	0	0	0	0	0	0	0	0	0	0	0	0
46	0	0	0	0	0	0	0	0	0	0	0	0	0	0	0	0	0
47	0	1	0	0	0	0	0	0	0	0	0	0	0	0	0	0	0
48	0	1	1	0	0	0	0	0	0	0	0	0	0	0	0	0	0
49	0	1	0	0	0	0	0	0	0	0	0	0	0	0	0	0	0
50	0	1	0	0	0	0	0	0	0	0	0	0	0	0	0	0	0
51	0	0	0	0	0	0	0	0	0	0	0	0	0	0	0	0	0
52	0	0	0	0	0	0	0	0	0	0	0	0	0	0	0	0	0
53	0	0	0	0	0	0	0	0	0	0	0	0	0	0	0	0	0
54	0	0	1	0	0	0	0	0	0	0	0	0	0	0	0	0	0
55	0	0	0	0	0	0	0	0	0	0	0	0	0	0	0	0	0
56	0	0	0	0	0	0	0	0	0	0	0	0	0	0	0	0	0
57	0	0	0	0	0	0	0	0	0	0	0	0	0	0	0	0	0
58	0	1	1	0	0	0	0	0	0	0	0	0	0	0	0	0	0
59	0	0	0	0	0	0	0	0	0	0	0	0	0	0	0	0	0
60	0	0	0	1	0	0	0	0	0	0	0	0	0	0	0	0	0
61	0	1	2	18	128	330	686	1600
62	0	0	1	1	27	210	280	672	672	1800
63	0	1	8	36	80	144	180	210	210	560	891	1872
64	0	1	8	36	84	216
65	0	1	12	30	140	240	350	840	840
66	0	0	1	1	1	1	8	27	150	336	420	880	1848
67	0	1	8	45	140	224
68	0	1	4	24	120	150	140	140	75	75	72	72	147	256	500	1521	2730
69	0	0	1	32	175	504	648	1440	2700
70	0	1	8	27	175	420	672	1800
Percent tumor free mice after therapeutic vaccination
Group	Day 10	13	16	20	23	26	30	33	37	41	44	48	51	56	62	68
28 Day Vax	0.4	0.8	1	1	1	1	1	1	1	1	1	1	1	1	1	1
21 Day Vax	0.5	0.7	0.9	0.9	0.9	0.9	0.9	0.9	0.9	0.9	0.9	0.9	0.9	0.9	0.9	0.9
14 Day Vax	0.4	0.6	0.7	0.9	0.9	0.9	0.9	0.9	0.9	0.9	0.9	0.9	0.9	0.9	0.9	0.9
7 Day Vax	0.6	0.5	0.8	1	1	1	1	1	1	1	1	1	1	1	1	1
3 Day Vax	0.2	0.5	1	1	1	1	1	1	1	1	1	1	1	1	1	1
1 Day Vax	0.9	0.8	0.9	1	1	1	1	1	1	1	1	1	1	1	1	1
Naive	0.3	0	0	0	0	0	0	0	0	0	0	0	0	0	0	0
